# Supplementary material
Source: publisher figshare collection journal article supplement (https://tandf.figshare.com/articles/dataset/_/4743550)
Supplement: Supplementary file 1 [file 1]

Online Supplementary Data 3

Phylogeny and paleobiogeography of Hegetotheriidae (Mammalia, Notoungulata)

FEDERICO D. SEOANE,<sup>\*,1</sup> SERGIO ROIG JUÑENT,<sup>2</sup> AND ESPERANZA CERDEÑO<sup>3</sup>

<sup>1</sup>Universidad de Buenos Aires. CONICET. Instituto de Estudios Andinos Don Pablo Groeber (IDEAN). Facultad de Ciencias Exactas y Naturales, Ricardo Güiraldes 2160 C1428EGA Buenos Aires, Argentina. [seoane.federico@gmail.com](mailto:seoane.federico@gmail.com);

<sup>2</sup>Instituto Argentino de Investigaciones de Zonas Áridas (IADIZA), CCT-CONICET-Mendoza, Avda. Ruiz Leal s/n. 5500, Argentina. [saroig@mendoza-conicet.gob.ar](mailto:saroig@mendoza-conicet.gob.ar);

<sup>3</sup>Paleontología, Instituto Argentino de Nivología, Glaciología y Ciencias Ambientales (IANIGLA), CCT-CONICET-Mendoza, Avda. Ruiz Leal s/n. 5500 Mendoza, Argentina. [espe@mendoza-conicet.gob.ar](mailto:espe@mendoza-conicet.gob.ar)

RH: SEOANE *ET AL.*—PHYLOGENY AND PALEOBIOGEOGRAPHY OF  
HEGETOTHERIIDAE

Journal of Vertebrate Paleontology

\*Corresponding author

APPENDIX 3. Data matrix used in the phylogenetic analysis, including 24 taxa and 39 characters. A (0,1), B (1,2), C (0,2), – for missing characters and not applied.

| Taxon                                 | 0           | 10          | 20         | 30       | 38 |
|---------------------------------------|-------------|-------------|------------|----------|----|
| <i>Archaeohyrax suniensis</i>         | 00000000002 | 1?0000000?  | ?000121100 | 01110102 |    |
| <i>Archaeohyrax patagonicus</i>       | 00000000002 | 100100000?  | ?000120000 | 01110002 |    |
| <i>Trachytherus spegazzinianus</i>    | 0000000?00? | ?0?0000000  | 0030?00040 | 2111011? |    |
| <i>Trachytherus alloxus</i>           | 1010-00?102 | 10?000000?  | ?030100040 | 11210111 |    |
| <i>Mesotherium cristatum</i>          | 1111-?200?? | ?1?0000000  | 0??2021341 | 32210??? |    |
| <i>Prohegetotherium sculptum</i>      | 00000010012 | 100000????  | 0011121100 | 20001000 |    |
| <i>Prohegetotherium schiaffinoi</i>   | 000000001A2 | 111000?10?  | ?11B121100 | 2000100? |    |
| <i>Prohegetotherium malalhuense</i>   | 0??0??10112 | 1?10??????? | ?121?2110? | ???01?0? |    |
| <i>Sallatherium altiplanense</i>      | 00000000112 | 1110?00??1  | ?011122220 | 1010110? |    |
| <i>Prosotherium garzoni</i>           | 0010-102002 | 0111?01210  | 0031100130 | 00201002 |    |
| <i>Propachyrucos smithwoodwardi</i>   | 00000102002 | 0111?01210  | 0031100130 | 0110101? |    |
| <i>Medistylus dorsatus</i>            | 1010-102102 | 0???0012??  | 1??110113? | ??201?01 |    |
| <i>Hegetotherium mirabile</i>         | 000001101A2 | B010000101  | 0111120000 | 21001110 |    |
| <i>Hegetotherium novum</i>            | ?0000?0?112 | 0????0????  | ?????2000? | ??001??? |    |
| <i>Hemihegetotherium achataleptum</i> | 10001110113 | 0110?0??01  | 0001120000 | C0001102 |    |
| <i>Hemihegetotherium trilobus</i>     | 100011001A3 | 0111000101  | ?002221000 | 01101102 |    |
| <i>Hemihegetotherium torresi</i>      | 10?01110113 | 0110?0?1?1  | 0?0?120000 | 220011?? |    |
| <i>Hegetotheriopsis sulcatus</i>      | 10000?01012 | 0?A0??????  | ?031?10000 | 0110100? |    |
| <i>Pachyrhinos moyanoi</i>            | 0111-100111 | 0111101212  | 0AA2120000 | 01201001 |    |
| <i>Paedotherium typicum</i>           | 1111-100101 | 0111001212  | 1002110000 | 11201101 |    |
| <i>Paedotherium minor</i>             | 1111-100102 | 0112001212  | 1002110000 | 1120110? |    |
| <i>Paedotherium bonaerense</i>        | 1111-110201 | 0112001212  | 1002120000 | 01201102 |    |
| <i>Tremacyllus incipiens</i>          | 1111-100211 | 0111111212  | 1002100020 | 012010?1 |    |
| <i>Tremacyllus impressus</i>          | 1111-110211 | 0111111212  | 1002100020 | 01201001 |    |
