# Supplementary material
Source: publisher figshare collection journal article supplement (https://tandf.figshare.com/articles/dataset/_/4743550)
Supplement: Supplementary file 3 [file 1]

Online Supplementary Data 1

Phylogeny and paleobiogeography of Hegetotheriidae (Mammalia, Notoungulata)

FEDERICO D. SEOANE,<sup>\*,1</sup> SERGIO ROIG JUÑENT,<sup>2</sup> and ESPERANZA CERDEÑO<sup>3</sup>

<sup>1</sup>Universidad de Buenos Aires. CONICET. Instituto de Estudios Andinos Don Pablo Groeber (IDEAN). Facultad de Ciencias Exactas y Naturales, Ricardo Güiraldes 2160 C1428EGA Buenos Aires, Argentina. [seoane.federico@gmail.com](mailto:seoane.federico@gmail.com);

<sup>2</sup>Instituto Argentino de Investigaciones de Zonas Áridas (IADIZA), CCT-CONICET-Mendoza, Avda. Ruiz Leal s/n. 5500, Argentina. [saroig@mendoza-conicet.gob.ar](mailto:saroig@mendoza-conicet.gob.ar);

<sup>3</sup>Paleontología, Instituto Argentino de Nivología, Glaciología y Ciencias Ambientales (IANIGLA), CCT-CONICET-Mendoza, Avda. Ruiz Leal s/n. 5500 Mendoza, Argentina. [espe@mendoza-conicet.gob.ar](mailto:espe@mendoza-conicet.gob.ar)

RH: SEOANE *ET AL.*—PHYLOGENY AND PALEOBIOGEOGRAPHY OF  
HEGETOTHERIIDAE

Journal of Vertebrate Paleontology

\*Corresponding author

APPENDIX 1. List of the species studied in this work. Main bibliographic references and specimens directly revised by FS in the Buenos Aires and La Plata museums

- Prohegetotherium malalhuense* (Cerdeño and Reguero, 2015).  
*Prohegetotherium schiaffinoi* (Kraglievich, 1932; Reguero and Cerdeño, 2005; Cerdeño and Reguero, 2015).  
*Prohegetotherium sculptum* (Cerdeño and Reguero, 2015). MACN-A 52-445, 12-446, 12-447, 12-448, 12-449, 12-450, 12-451. MACN-PV 15280, 15281, 15296, 15297, 15298.  
*Sallatherium altiplanense* (Reguero and Cerdeño, 2005; Cerdeño and Reguero, 2015).  
*Hegetotheriopsis sulcatus* (Kramarz and Paz, 2013; Cerdeño and Reguero, 2015). MACN-PV CH-2011, CH-2012, CH-2014, CH-2015.  
*Hegetotherium novum* (Bordas, 1939). MACN-PV 11749.  
*Hegetotherium mirabile* (Cerdeño and Reguero, 2015). MLP 12-2648, 12-2740, 12-2774. MACN-A 631, 632, 1743, 1744, 3322, 3323, 3324, 3325, 3326, 9910, 9911, 9912, 9913, 9894, 9895 to 9908.  
*Hemihegetotherium torresi* (Cabrera and Kraglievich, 1931; Cerdeño and Montalvo, 2002). MLP 60-VI-18-1, 60-VI-18-2, 76-VI-12-25.  
*Hemihegetotherium achataleptum* (Cerdeño and Montalvo, 2002; Cerdeño and Reguero, 2015). MACN-PV 8156, 8197, 8198, 8491.  
*Hemihegetotherium trilobus* (Croft and Anaya, 2006; Cerdeño and Reguero, 2015).  
*Prosotherium garzoni* (Cerdeño and Reguero, 2015). MACN-A 52-455, 52-456, 52-457, 52-560, 52-463, 52-464, 52-466, 52-467, 52, 468.  
*Propachyrucos smithwoodwardi* (Cerdeño and Reguero, 2015). MACN-A 52-451, 52-452, 52-454.  
*Medistylus dorsatus* (Reguero *et al.*, 2007; Cerdeño and Reguero, 2015). MACN-A 52-488.  
*Pachyrucos moyanoi* (Cerdeño and Reguero, 2015). MACN-A 259, 260, 261, 272, 273, 274, 275, 276, 279 to 296, 319, 320, 321, 9957, 9958. MLP 12-1830, 12-1966, 12-1989, 12-1990, 12-2018, 12-2986, 12-2087, 12-2149.  
*Paedotherium bonaerense* (Cerdeño and Bond, 1998). MACN-A 1184, 1667, 1674, 5770. MACN-PV 11170. MLP 91-IV-15-6.  
*Paedotherium typicum* (Cerdeño and Bond, 1998). MACN-A 518, 519, 10269. MACN-PV 5754, 5755, 5988. MLP 12-1782, 91-IV-7-66.  
*Paedotherium minor* (Cabrera, 1937; Reguero *et al.*, 2015). MLP 29-IX-1-116.  
*Paedotherium kakai* (Reguero *et al.*, 2015).  
*Tremacyllus impressus* (Cerdeño and Bond, 1998; Cerdeño and Reguero, 2015). MACN-A 1377, 1668, 1669, 1672, 1673, 10272, 10273.  
*Tremacyllus incipiens* (Cerdeño and Bond, 1998; Cerdeño and Reguero, 2015).  
*Archaeohyrax patagonicus* (Billet *et al.*, 2009).  
*Archaeohyrax suniensis* (Billet *et al.*, 2009).  
*Trachytherus spegazzinianus* (Billet *et al.*, 2008).  
*Trachytherus alloxus* (Billet *et al.*, 2008).  
*Mesotherium cristatum* (Billet *et al.*, 2008).

Institutional abbreviations:

MACN-A: Museo Argentino de Ciencias Naturales ‘Bernardino Rivadavia’, Ameghino Collection, Buenos Aires, Argentina.

MACN-PV: Museo Argentino de Ciencias Naturales 'Bernardino Rivadavia',  
Paleontology of Vertebrate Collection, Buenos Aires, Argentina.  
MLP: Museo de La Plata, La Plata, Argentina.

#### LITERATURE CITED

- Billet G., C. de Muizon, and B. Mamaní Quispe. 2008. Late Oligocene mesotheriids (Mammalia, Notoungulata) from Salla and Lacayani (Bolivia): implications on basal mesotheriid phylogeny and distribution. *Zoological Journal of the Linnean Society* 152:153–200.
- Billet, G., B. Patterson, and C. de Muizon. 2009. Craniodental anatomy of late Oligocene archaeohyracids (Notoungulata, Mammalia) from Bolivia and Argentina and new phylogenetic hypothesis. *Zoological Journal of the Linnean Society* 155:458–509.
- Bordas, A. F. 1939. Diagnósis de algunos mamíferos de las capas con *Colpodon* del Valle del Río Chubut (República Argentina). *Physis* 14:413–433.
- Cabrera, A. 1937. Notas sobre el suborden Typotheria. *Notas del Museo de La Plata* 2:17–43.
- Cabrera, A., and L. Kraglievich. 1931. Diagnósis previas de los ungulados fósiles del Arroyo Chasicó. *Notas Preliminares del Museo de La Plata* 1:107–113.
- Cerdeño, E., and M. Bond. 1998. Taxonomic revision and phylogeny of *Paedotherium* and *Tremacyllus* (Pachyrhinae, Hegetotheriidae, Notoungulata) from the late Miocene to Pleistocene of Argentina. *Journal of Vertebrate Paleontology* 18:799–811.
- Cerdeño, E., and C. I. Montalvo. 2002. Los Hegetotheriinae (Hegetotheriidae, Notoungulata) del Mioceno superior de la provincia de La Pampa, Argentina. *Revista del Museo Argentino de Ciencias Naturales* 4:35–43.
- Cerdeño, E., and M. Reguero. 2015. The Hegetotheriidae (Mammalia, Notoungulata) assemblage from the late Oligocene of Mendoza, central-western Argentina. *Journal of Vertebrate Paleontology* 35:e907173 (14 pp.).
- Croft, D. A., and F. Anaya. 2006. A new Middle Miocene hegetotheriid (Notoungulata: Typotheria) and a phylogeny of the Hegetotheriidae. *Journal of Vertebrate Paleontology* 26:387–399.
- Kraglievich, L. 1932. Nuevos apuntes para la geología y paleontología uruguayas. *Anales del Museo de Historia Natural de Montevideo* 3:1–65.
- Kramarz, A., and E. R. Paz. 2013. Un Hegetotheriidae (Mammalia, Notoungulata) basal del Mioceno temprano de Patagonia. *Revista Mexicana de Ciencias Geológicas* 30:186–195.
- Reguero, M., and E. Cerdeño. 2005. New late Oligocene Hegetotheriidae (Mammalia, Notoungulata) from Salla, Bolivia. *Journal of Vertebrate Paleontology* 25:674–684.
- Reguero, M. A., M. T. Dozo, and E. Cerdeño. 2007. A poorly known rodent-like mammal (Pachyrhinae, Hegetotheriidae, Notoungulata) from the Deseadan (Late Oligocene) of Argentina. Paleoeology, biogeography and radiation of the rodent-like ungulates in South America. *Journal of Paleontology* 81:1298–1304.
- Reguero, M., A. M. Candela, C. I. Galli, R. Bonini, and D. Voglino. 2015. A new hypsodont Notoungulate (Hegetotheriidae, Pachyrhinae) from the late Miocene of the Eastern Cordillera, Salta province, Northwest of Argentina. *Andean Geology* 42:56–70.
